# Supplementary material for: Conformational dynamics of superoxide dismutase (SOD1) in osmolytes: a molecular dynamics simulation study
Source: Royal Society of Chemistry journal article supplement (doi:10.1039/d0ra02151b), 2020-01-01
Supplement: d0ra02151b1.pdf [file d0ra02151b1.pdf]

## Conformational dynamics of superoxide dismutase (SOD1) in osmolytes: a molecular dynamics simulation study

**Author's name and affiliation:** Ishrat Jahan

Department of Chemistry, Aligarh Muslim University,

Aligarh-202002, U.P., India

**Email:** [jishrat17@gmail.com](mailto:jishrat17@gmail.com)

**Corresponding Author:** Shahid M. Nayeem\*,

Associate Professor

Department of Chemistry, Aligarh Muslim University,

Aligarh-202002, U.P, India

**Mobile:** +91-9412527078

**Email:** [msnayeem.ch@amu.ac.in](mailto:msnayeem.ch@amu.ac.in)

**The force field parameter files i.e. urea.itp file generated using ATB server is given below.**

[ moleculetype ]

; Name nrexcl

UREA 3

[ atoms ]

; nr type resnr resid atom cgnr charge mass

1 H 1 UREA H22U 1 0.426 1.0080

2 NT 1 UREA N2U 2 -0.978 14.0067

3 H 1 UREA H21U 3 0.426 1.0080

4 C 1 UREA CU 4 0.908 12.0110

5 O 1 UREA OU 5 -0.656 15.9994

6 NT 1 UREA N1U 6 -0.978 14.0067

7 H 1 UREA H11U 7 0.426 1.0080

8 H 1 UREA H12U 8 0.426 1.0080

; total charge of the molecule: 0.000

```

[ bonds ]
; ai aj funct c0 c1
  1 2 2 0.1010 2.1076e+07
  2 3 2 0.1010 2.1076e+07
  2 4 2 0.1380 1.1000e+07
  4 5 2 0.1230 1.6600e+07
  4 6 2 0.1380 1.1000e+07
  6 7 2 0.1010 2.1076e+07
  6 8 2 0.1010 2.1076e+07
[ pairs ]
; ai aj funct ; all 1-4 pairs but the ones excluded in GROMOS itp
  1 5 1
  1 6 1
  2 7 1
  2 8 1
  3 5 1
  3 6 1
  5 7 1
  5 8 1
[ angles ]
; ai aj ak funct angle fc
  1 2 3 2 113.00 545.00
  1 2 4 2 115.00 460.00
  3 2 4 2 115.00 460.00
  2 4 5 2 124.00 730.00
  2 4 6 2 120.00 560.00
  5 4 6 2 124.00 730.00
  4 6 7 2 115.00 460.00
  4 6 8 2 115.00 460.00
  7 6 8 2 113.00 545.00
[ dihedrals ]
; GROMOS improper dihedrals
; ai aj ak al funct angle fc
  4 2 5 6 2 0.00 167.36
[ dihedrals ]
; ai aj ak al funct ph0 cp mult
  2 4 6 7 1 180.00 33.50 2
  3 2 4 6 1 180.00 33.50 2
[ exclusions ]
; ai aj funct ; GROMOS 1-4 exclusions

```

The Lennard-Jones parameters i.e. C6 and C12 for the GROMOS force field for urea are given below.

| Atom type | C6 (kJ mol <sup>-1</sup> nm <sup>6</sup> ) | C12 (kJ mol <sup>-1</sup> nm <sup>12</sup> ) |
|-----------|--------------------------------------------|----------------------------------------------|
| H         | 0                                          | 0                                            |
| NT        | 0.0024364096                               | 5.0625e <sup>-06</sup>                       |
| C         | 0.0023406244                               | 4.937284e <sup>-06</sup>                     |
| O         | 0.0022619536                               | 1e <sup>-06</sup>                            |

**The force field parameter files i.e. tmao.itp file generated using ATB server is provided below.**

```
[ moleculetype ]
; Name nrexcl
TMAO 3
[ atoms ]
; nr type resnr resid atom cgnr charge mass
 1 HC 1 TMAO H9 1 0.167 1.0080
 2 C 1 TMAO C3 2 -0.411 12.0110
 3 HC 1 TMAO H7 3 0.167 1.0080
 4 HC 1 TMAO H8 4 0.167 1.0080
 5 NL 1 TMAO N1 5 0.435 14.0067
 6 OE 1 TMAO O1 6 -0.705 15.9994
 7 C 1 TMAO C1 7 -0.411 12.0110
 8 HC 1 TMAO H1 8 0.167 1.0080
 9 HC 1 TMAO H2 9 0.167 1.0080
10 HC 1 TMAO H3 10 0.167 1.0080
11 C 1 TMAO C2 11 -0.411 12.0110
12 HC 1 TMAO H4 12 0.167 1.0080
13 HC 1 TMAO H5 13 0.167 1.0080
14 HC 1 TMAO H6 14 0.167 1.0080
; total charge of the molecule: -0.000
[ bonds ]
; ai aj funct c0 c1
 1 2 2 0.1090 1.2300e+07
 2 3 2 0.1090 1.2300e+07
 2 4 2 0.1090 1.2300e+07
 2 5 2 0.1500 3.5556e+06
 5 6 2 0.1380 4.4633e+06
 5 7 2 0.1500 3.5556e+06
 5 11 2 0.1500 3.5556e+06
 7 8 2 0.1090 1.2300e+07
 7 9 2 0.1090 1.2300e+07
 7 10 2 0.1090 1.2300e+07
11 12 2 0.1090 1.2300e+07
11 13 2 0.1090 1.2300e+07
11 14 2 0.1090 1.2300e+07
[ pairs ]
; ai aj funct ; all 1-4 pairs but the ones excluded in GROMOS itp
 1 6 1
 1 7 1
 1 11 1
 2 8 1
 2 9 1
 2 10 1
 2 12 1
 2 13 1
 2 14 1
```

```
3 6 1
3 7 1
3 11 1
4 6 1
4 7 1
4 11 1
6 8 1
6 9 1
6 10 1
6 12 1
6 13 1
6 14 1
7 12 1
7 13 1
7 14 1
8 11 1
9 11 1
10 11 1
```

```
[ angles ]
```

```
; ai aj ak funct angle fc
1 2 3 2 111.00 530.00
1 2 4 2 111.00 530.00
1 2 5 2 111.40 532.00
3 2 4 2 111.00 530.00
3 2 5 2 111.40 532.00
4 2 5 2 111.40 532.00
2 5 6 2 109.00 1680.51
2 5 7 2 109.00 1680.51
2 5 11 2 109.00 1680.51
6 5 7 2 109.00 1680.51
6 5 11 2 109.00 1680.51
7 5 11 2 109.00 1680.51
5 7 8 2 111.40 532.00
5 7 9 2 111.40 532.00
5 7 10 2 111.40 532.00
8 7 9 2 111.00 530.00
8 7 10 2 111.00 530.00
9 7 10 2 111.00 530.00
5 11 12 2 111.40 532.00
5 11 13 2 111.40 532.00
5 11 14 2 111.40 532.00
12 11 13 2 111.00 530.00
12 11 14 2 111.00 530.00
13 11 14 2 111.00 530.00
```

```
[ dihedrals ]
```

```
; GROMOS improper dihedrals
```

```
; ai aj ak al funct angle fc
```

```
[ dihedrals ]
```

```
; ai aj ak al funct ph0 cp mult
3 2 5 7 1 0.00 1.05 3
```

7 5 11 12 1 0.00 1.05 3  
 11 5 7 8 1 0.00 1.05 3  
 [ exclusions ]  
 ; ai aj funct ; GROMOS 1-4 exclusions

**The Lennard-Jones parameters i.e. C6 and C12 for the GROMOS force field for TMAO are given below.**

| Atom type | C6 (kJ mol <sup>-1</sup> nm <sup>6</sup> ) | C12 (kJ mol <sup>-1</sup> nm <sup>12</sup> ) |
|-----------|--------------------------------------------|----------------------------------------------|
| HC        | 8.464e <sup>-05</sup>                      | 1.5129e <sup>-08</sup>                       |
| C         | 0.0023406244                               | 4.937284e <sup>-06</sup>                     |
| NL        | 0.0024364096                               | 2.319529e <sup>-06</sup>                     |
| OE        | 0.0022619536                               | 1.21e <sup>-06</sup>                         |

**Table S1: Number of osmolytes and water molecules used during the simulations.**

| System           | N <sub>water</sub> | N <sub>urea</sub> | N <sub>TMAO</sub> |
|------------------|--------------------|-------------------|-------------------|
| Apo_water        | 6418               | -                 | -                 |
| Apo_U 4 M        | 5459               | 500               | -                 |
| Apo_U 4 M_T 2 M  | 4756               | 500               | 250               |
| Holo_water       | 6422               | -                 | -                 |
| Holo_U 4 M       | 4760               | 500               | -                 |
| Holo_U 4 M_T 2 M | 4709               | 500               | 250               |

### Validation of force field generated from ATB

In order to validate the force field generated from ATB, we have calculated the thermodynamic property (i.e. Density), transport property (self-diffusion coefficient) and structural property (RDF and # of hydrogen bonds) of 1.94 m TMAO box and compared our result with the Shea force field<sup>1</sup> and United atom (UA) ff (generated from ATB) of TMAO<sup>2</sup>. We found that the density of TMAO solution in our case at 1.94 m TMAO is 978 kg/m<sup>3</sup>, for UA model it is 980 kg/m<sup>3</sup> for solution of concentration 1.94 m and in case of Shea model it is 990 kg/m<sup>3</sup> for TMAO solution of molality 1.94 m<sup>2</sup>. The ratio of self-diffusion coefficient of water in TMAO water solution to the self-diffusion coefficient of pure water in our case is found to be 0.71, in UA model it is 0.7 and for Shea model it is 0.7 (1.94 m) × 10<sup>-9</sup> m<sup>2</sup>/s. The number of hydrogen bond per TMAO molecule is 2.8 (1.94 m TMAO), for UA model it is <

2.5 and for Shea model it is  $< 3$  ( $\sim 2.8$ ) for 1.94 mol/kg solution. The thermodynamic property obtained in our case is found to be approx. similar to the reported values which validates the force field used in the simulations. RDF of NT-NT is also calculated and the plot obtained in our case shows similar pattern as shown by UA model<sup>2</sup>.

### The RDF plot of NT-NT and NT-OW

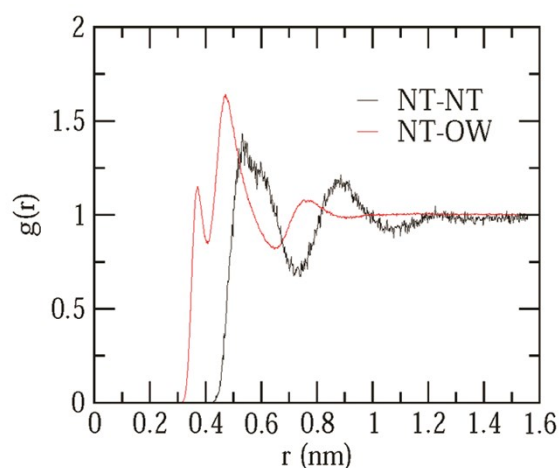

The thermodynamic properties of UA model shows similarity with the Shea model. However the deviation from the experimental data could be explained in terms of weak solute-water interactions, a consequence of non-optimal assignment of interaction parameter<sup>2</sup>.

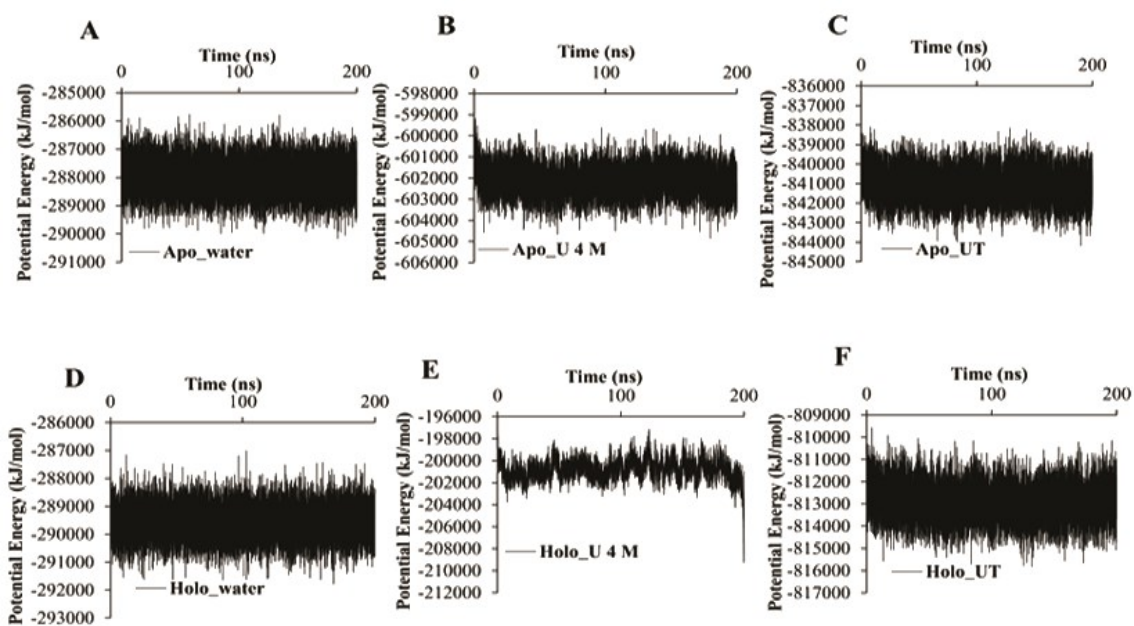

**Figure S1:** Potential energy of apo and holo SOD1 in (A & D) water, (B & E) urea and (C & F) urea-TMAO solution.

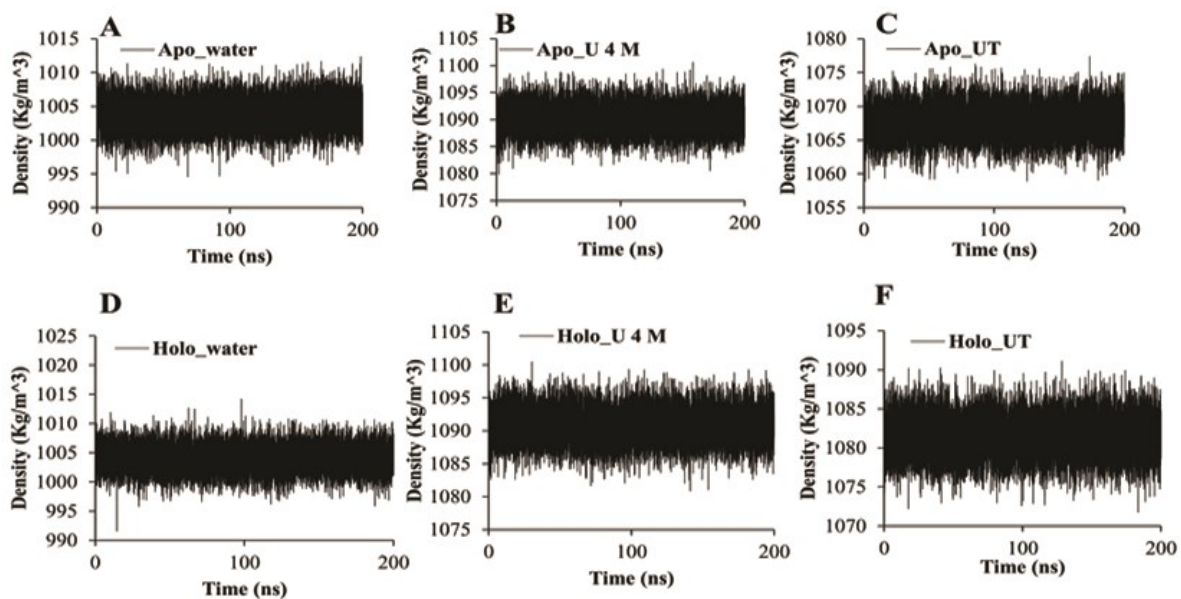

**Figure S2:** Density of apo and holo SOD1 in (A & D) water, (B & E) urea and (C & F) urea-TMAO solution.

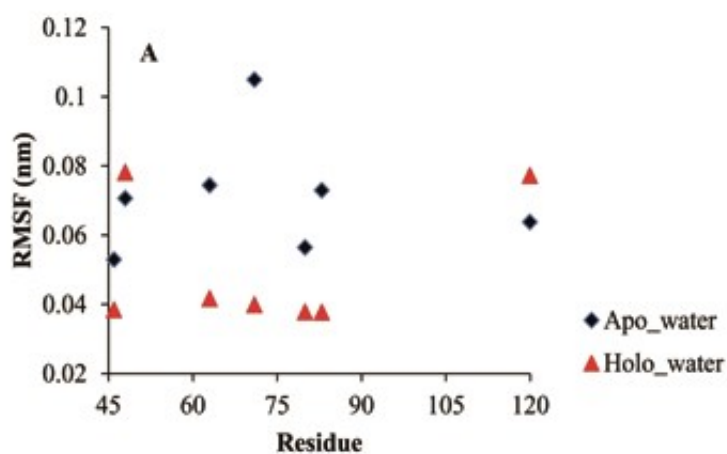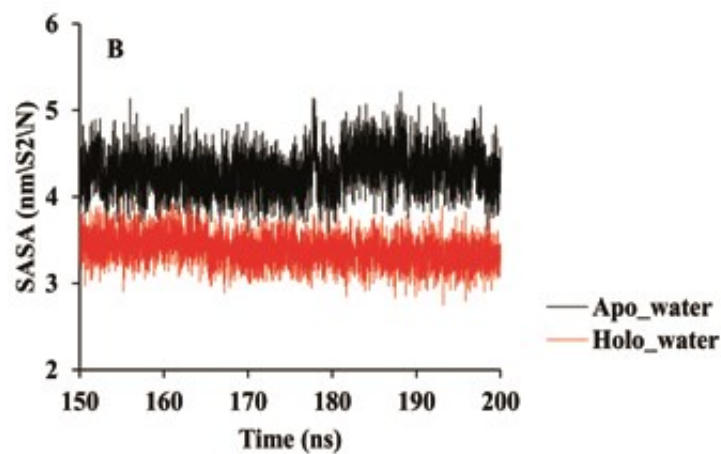

**Figure S3:** (A) The root mean square fluctuation (RMSF), (B) hydrophobic SASA of residues interacted with metal ions in apo and holo SOD1 in water.

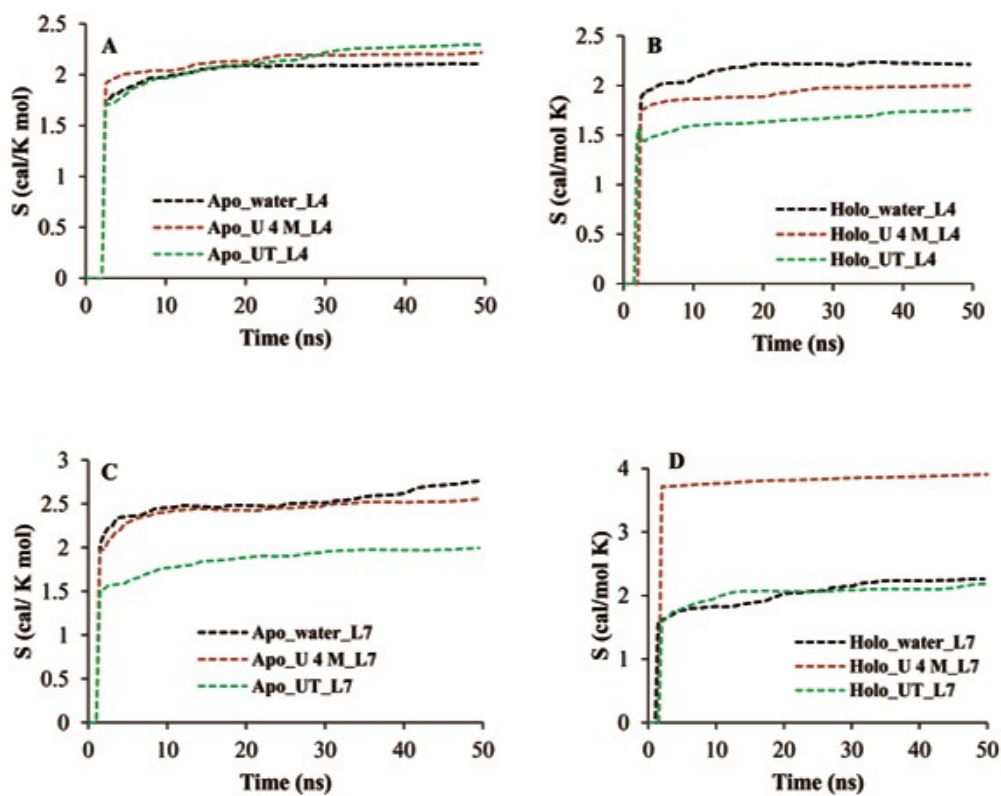

**Figure S4:** Configurational entropy of backbone (per atom) of loop IV & VII of apo and holo SOD1 in water, urea and urea-TMAO solution.



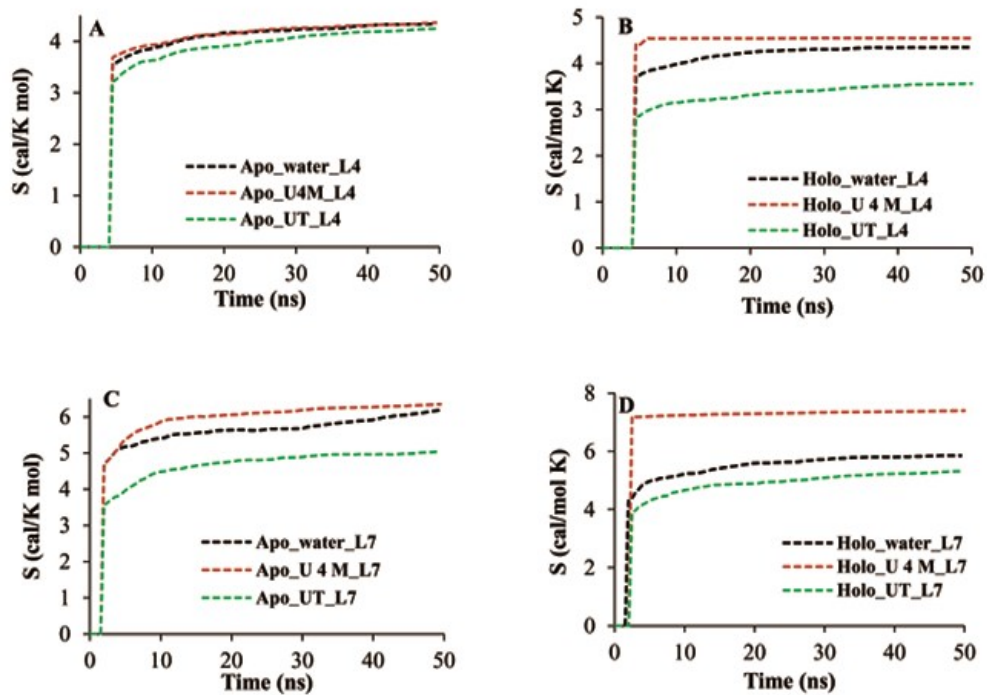

**Figure S5:** Configurational entropy of sidechain (per atom) of loop IV & VII of apo and holo SOD1 in water, urea and urea-TMAO solution.

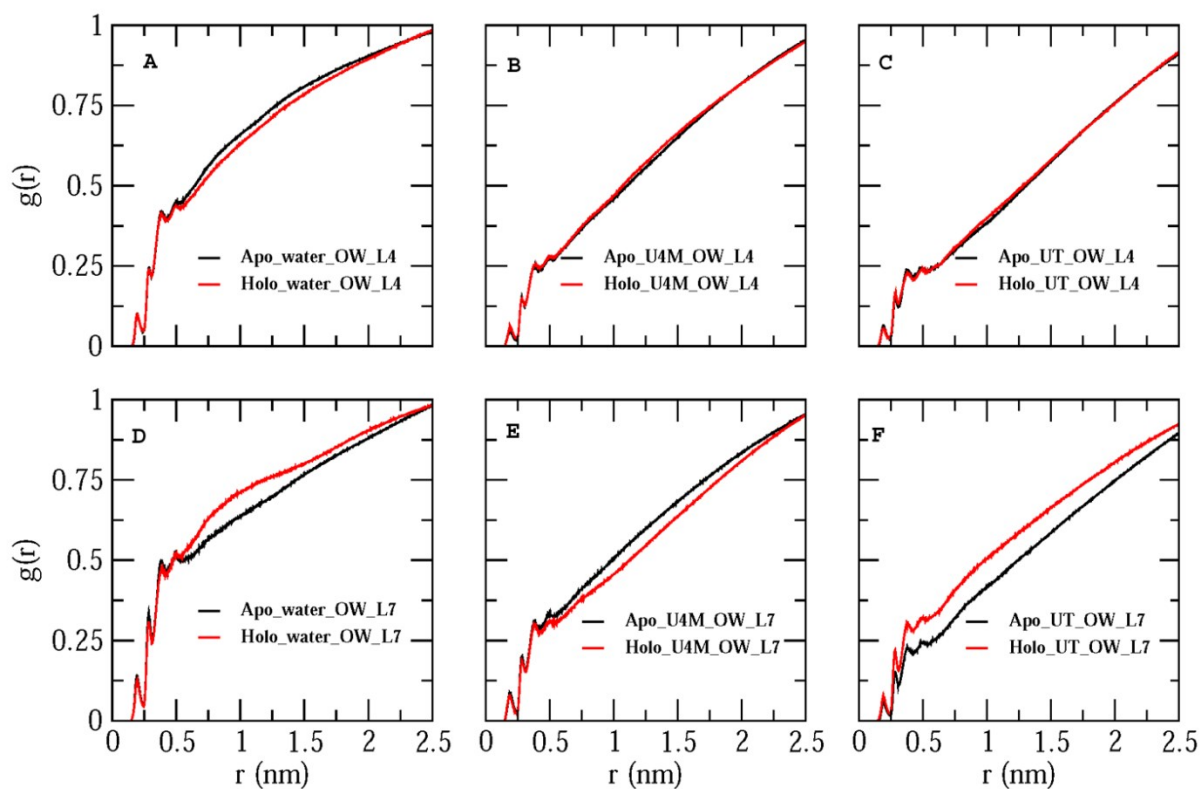

**Figure S6:** Radial distribution of oxygen of water (OW) molecules around loop IV & VII of apo and holo SOD1 in all the three system.

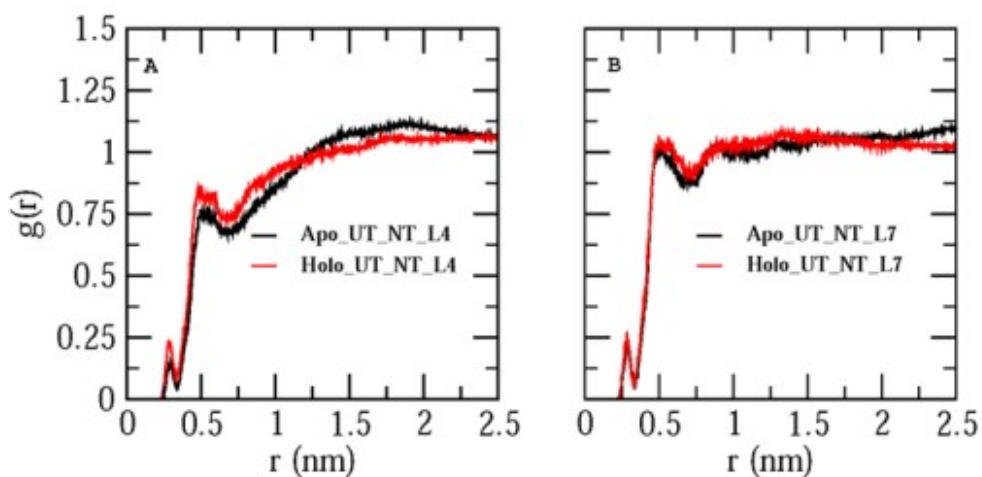

**Figure S7:** Radial distribution of nitrogen of TMAO (NT) molecules around loop IV & VII of apo and holo SOD1 in ternary system.

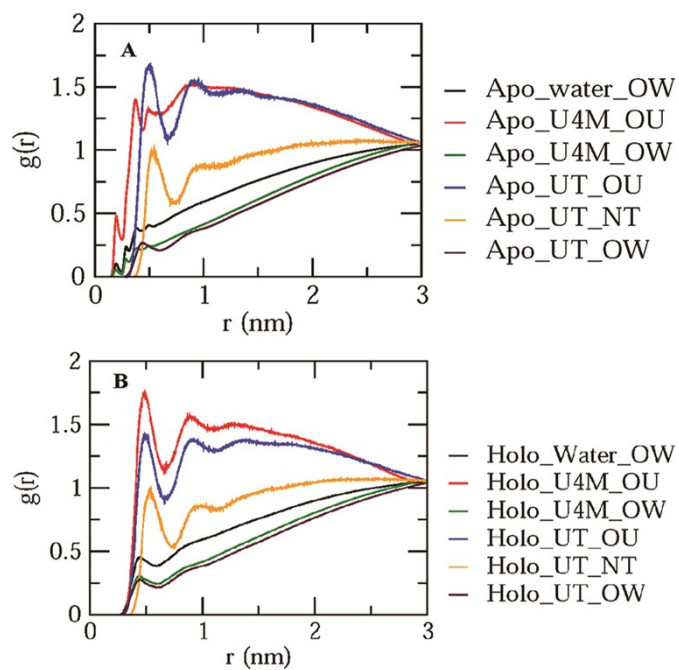

**Figure S8:** Radial distribution of oxygen of water (OW), oxygen of urea (OU) and nitrogen of TMAO (NT) molecules around apo and holo SOD1 protein in water, urea and ternary solution.

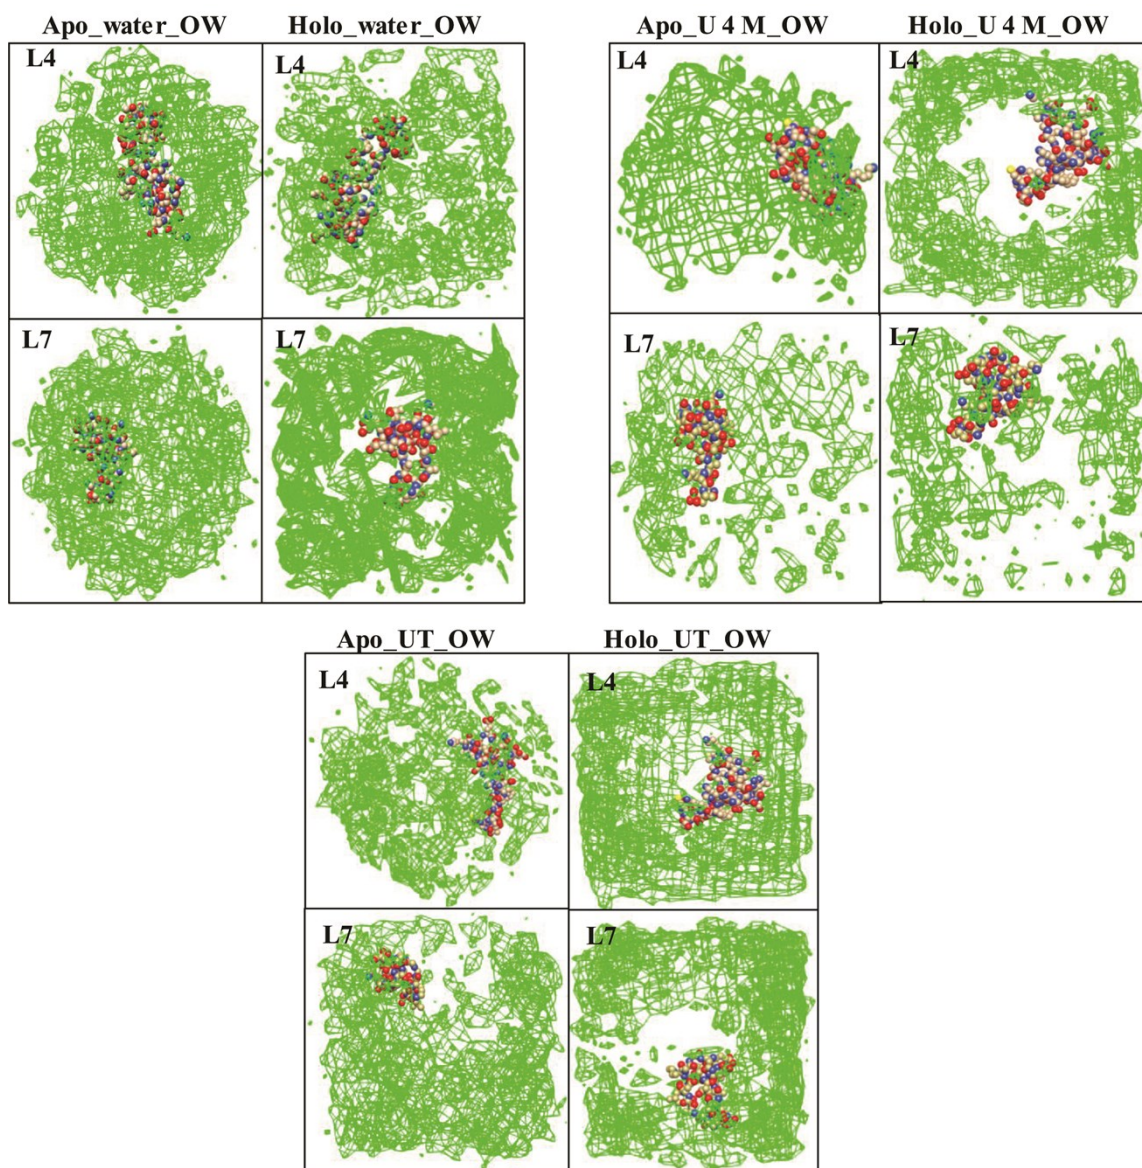

**Figure S9:** The SDF of oxygen of water (OW) molecules around loop IV & VII of apo and holo SOD1 in all the three system (loops are shown in VDW method and C, N, O in khaki, blue and red colour respectively) (SDF's are shown in iso-surface in green colour in the first solvation shell corresponding to rdf).

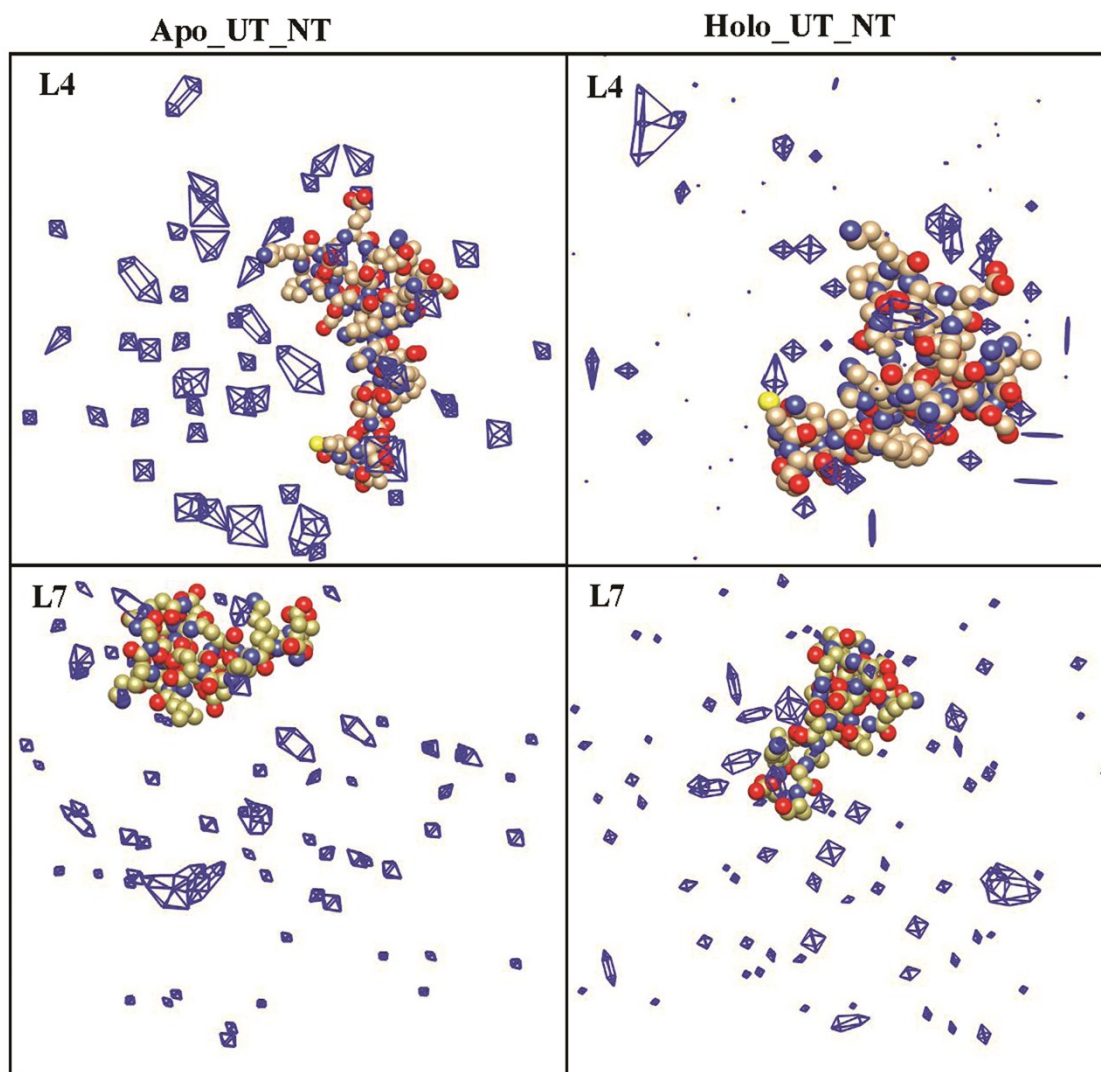

**Figure S10:** The SDF of nitrogen of TMAO (NT) molecules around loop IV & VII of apo and holo SOD1 in ternary system (loops are shown in VDW method and C, N, O in khaki, blue and red colour respectively) (SDF's are shown in iso-surface in blue colour in the first solvation shell corresponding to rdf).

#### References:

- (1) Larini, L.; Shea, J. E., Double resolution model for studying TMAO/water effective interactions. *J Phys Chem B* **2013**, 117, (42), 13268-77.
- (2) Markthaler, D.; Zeman, J.; Baz, J.; Smiatek, J.; Hansen, N., Validation of Trimethylamine-N-oxide (TMAO) Force Fields Based on Thermophysical Properties of Aqueous TMAO Solutions. *J Phys Chem B* **2017**, 121, (47), 10674-10688.
